# Supplementary material for: First-principles study of lead-free A3InX6 (A = Rb, Cs; X = Cl, Br, I) defect -perovskites: structural, electronic, optical, and mechanical properties
Source: Royal Society of Chemistry journal article supplement (doi:10.1039/d6ra00473c), 2026-04-27
Supplement: d6ra00473c1.pdf [file d6ra00473c1.pdf]

## First-Principles Study of Lead-Free $A_3InX_6$ ( $A = Rb, Cs$ ; $X = Cl, Br, I$ ) Defect -Perovskites: Structural, Electronic, Optical, and Mechanical Properties

Rifat Rafiu<sup>1</sup>, Md. Sakib Hasan<sup>1</sup>, Imtiaz Ahamed Apon<sup>2</sup>, Md. Azizur Rahman<sup>3\*</sup>, Mohamed Benghanem<sup>4\*\*</sup>, Amnah Mohammed Alsuhaibani<sup>5</sup>, Moamen S. Refat<sup>6</sup>, Nouredine Elboughdiri<sup>7</sup>

<sup>1</sup>Department of Material Science and Engineering, Khulna University of Engineering & Technology (KUET), Khulna -9203, Bangladesh.

<sup>2</sup>Department of Electrical and Electronic Engineering, Bangladesh Army University of Science and Technology (BAUST), Saidpur-5311, Bangladesh.

<sup>3</sup>Department of Electrical and Electronic Engineering, Begum Rokeya University, Rangpur, 5400, Bangladesh.

<sup>4</sup>Department of Physics, Faculty of Science, Islamic University of Madinah, Madinah 42351, Saudi Arabia.

<sup>5</sup>Department of Sports Health, College of Sport Sciences & Physical Activity, Princess Nourah bint Abdulrahman University P.O. Box 84428, Riyadh 11671, Saudi Arabia.

<sup>6</sup>Department of Chemistry, College of Science, Taif University, P.O. Box 11099, Taif 21944, Saudi Arabia.

<sup>7</sup>Chemical Engineering Department, College of Engineering, University of Ha'il, P.O. Box 2440, 81441, Ha'il, Saudi Arabia.

Corresponding Author's Email: [\\*azizurrahmanatik49@gmail.com](mailto:*azizurrahmanatik49@gmail.com) (Md. Azizur Rahman).

[\\*\\*mbenghanem@iu.edu.sa](mailto:**mbenghanem@iu.edu.sa) (M. Benghanem)

$$n\lambda = 2d\sin\theta \quad (\text{S1})$$

$$d_{hkl} = \frac{a}{\sqrt{h^2 + k^2 + l^2}} \quad (\text{S2})$$

$$\alpha(\omega) = \sqrt{2\omega \left[ \sqrt{\varepsilon_1^2(\omega) + \varepsilon_2^2(\omega)} - \varepsilon_1(\omega) \right]^{\frac{1}{2}}} \quad (\text{S3})$$

$$\sigma_1(\omega) = \frac{2\pi e^2 \hbar}{m^2 \omega \Omega} \sum_{k,v,c} |\langle \psi_{ck} | p | \psi_{vk} \rangle|^2 \delta(E_{ck} - E_{vk} - \hbar\omega) \quad (\text{S4})$$

$$\varepsilon(\omega) = \varepsilon_1(\omega) + jE_2(\omega) \quad (\text{S5})$$

$$\varepsilon_1(\omega) = 1 + \frac{2}{\pi} P \int_0^{\infty} \frac{\omega' \varepsilon_2(\omega')}{\omega'^2 - \omega^2} d\omega' \quad (\text{S6})$$

$$\varepsilon_2(\omega) = \frac{2\pi e^2}{\Omega \varepsilon_0} \sum_{k,v,c} |\langle \Psi_k^c | \hat{u} \cdot \vec{r} | \Psi_k^v \rangle|^2 \delta(E_k^c - E_k^v - E) \quad (\text{S7})$$

$$R(\omega) = \frac{(\eta - 1)^2 + k^2}{(\eta + 1)^2 + k^2} \quad (\text{S8})$$

$$\eta'(\omega) = \eta(\omega + i k(\omega)) \quad (\text{S9})$$

$$n(\omega) = \frac{1}{\sqrt{2}} \left[ (\varepsilon_1(\omega)^2 + \varepsilon_2(\omega)^2)^{\frac{1}{2}} + \varepsilon_1(\omega) \right]^{\frac{1}{2}} \quad (\text{S10})$$

$$k(\omega) = \frac{1}{\sqrt{2}} \left[ (\varepsilon_1(\omega)^2 + \varepsilon_2(\omega)^2)^{\frac{1}{2}} - \varepsilon_1(\omega) \right]^{\frac{1}{2}} \quad (\text{S11})$$

**Table S1.** Optimized structural parameters and atomic fractional coordinates of  $\text{Rb}_3\text{InX}_6$  obtained from first-principles calculations.

| Atom | Wyckoff | x      | y      | z      |
|------|---------|--------|--------|--------|
| In   | 4a      | 0.0000 | 0.0000 | 0.0000 |
| Rb   | 4b      | 0.5000 | 0.0000 | 0.0000 |
| Rb   | 8c      | 0.2500 | 0.2500 | 0.7500 |

|                  |     |          |        |        |
|------------------|-----|----------|--------|--------|
| X (X= Cl, Br, I) | 24e | 0.219174 | 0.0000 | 0.0000 |
|------------------|-----|----------|--------|--------|

**Table S2.** Optimized structural parameters and atomic fractional coordinates of  $\text{Cs}_3\text{InX}_6$  obtained from first-principles calculations.

| Atom             | Wyckoff | x        | y      | z      |
|------------------|---------|----------|--------|--------|
| In               | 4a      | 0.0000   | 0.0000 | 0.0000 |
| Cs               | 4b      | 0.5000   | 0.0000 | 0.0000 |
| Cs               | 8c      | 0.2500   | 0.2500 | 0.7500 |
| X (X= Cl, Br, I) | 24e     | 0.219174 | 0.0000 | 0.0000 |

**Table S3.** The energy band gap, lattice constants, unit cell volume & formation enthalpy of  $\text{A}_3\text{InX}_6$  (A=Rb, Cs, and X=Cl, Br, I) Perovskites

| Ref.      | Compounds                  | Band Gaps ( $E_g$ )        | Lattice Constant, a( $\text{\AA}$ ) | Functionals    |                |
|-----------|----------------------------|----------------------------|-------------------------------------|----------------|----------------|
| This work | $\text{Rb}_3\text{InCl}_6$ | 3.695                      | -                                   | GGA-PBESOL     |                |
|           | $\text{Rb}_3\text{InBr}_6$ | 2.595                      | -                                   |                |                |
|           | $\text{Rb}_3\text{InI}_6$  | 1.429                      | -                                   |                |                |
|           | $\text{Cs}_3\text{InCl}_6$ | 3.801                      | -                                   |                |                |
|           | $\text{Cs}_3\text{InBr}_6$ | 2.755                      | -                                   |                |                |
|           | $\text{Cs}_3\text{InI}_6$  | 1.590                      | -                                   |                |                |
|           | This work                  | $\text{Rb}_3\text{InCl}_6$ | 5.004                               | -              | Hybrid (HSE06) |
|           |                            | $\text{Rb}_3\text{InBr}_6$ | 3.892                               | -              |                |
|           |                            | $\text{Rb}_3\text{InI}_6$  | 2.550                               | -              |                |
|           |                            | $\text{Cs}_3\text{InCl}_6$ | 5.116                               | -              |                |
|           |                            | $\text{Cs}_3\text{InBr}_6$ | 4.038                               | -              |                |
|           |                            | $\text{Cs}_3\text{InI}_6$  | 2.556                               | -              |                |
| [1]       | $\text{Na}_3\text{GaBr}_6$ | 1.991                      | 7.747                               | GGA-PBE        |                |
|           | $\text{K}_3\text{GaBr}_6$  | 1.445                      | 8.085                               |                |                |
|           | $\text{Na}_3\text{GaBr}_6$ | 2.602                      | -                                   | mGGA-RSCAN     |                |
|           | $\text{K}_3\text{GaBr}_6$  | 1.985                      | -                                   |                |                |
|           | $\text{Na}_3\text{GaBr}_6$ | 3.096                      | -                                   | Hybrid (HSE06) |                |
|           | $\text{K}_3\text{GaBr}_6$  | 2.567                      | -                                   |                |                |
| [2]       | $\text{Cs}_3\text{InCl}_6$ | 1.45                       | -                                   |                |                |

|     |                            |      |   |              |
|-----|----------------------------|------|---|--------------|
|     | $\text{Cs}_3\text{InBr}_6$ | 1.55 | - |              |
|     | $\text{Cs}_3\text{InI}_6$  | 1.60 | - |              |
|     | $\text{Cs}_3\text{TlCl}_6$ | 0.93 | - |              |
|     | $\text{Cs}_3\text{TlBr}_6$ | 1.01 | - |              |
|     | $\text{Cs}_3\text{InI}_6$  | 0.99 | - |              |
| [3] | $\text{Rb}_3\text{InCl}_6$ | 5.22 | - | Experimental |

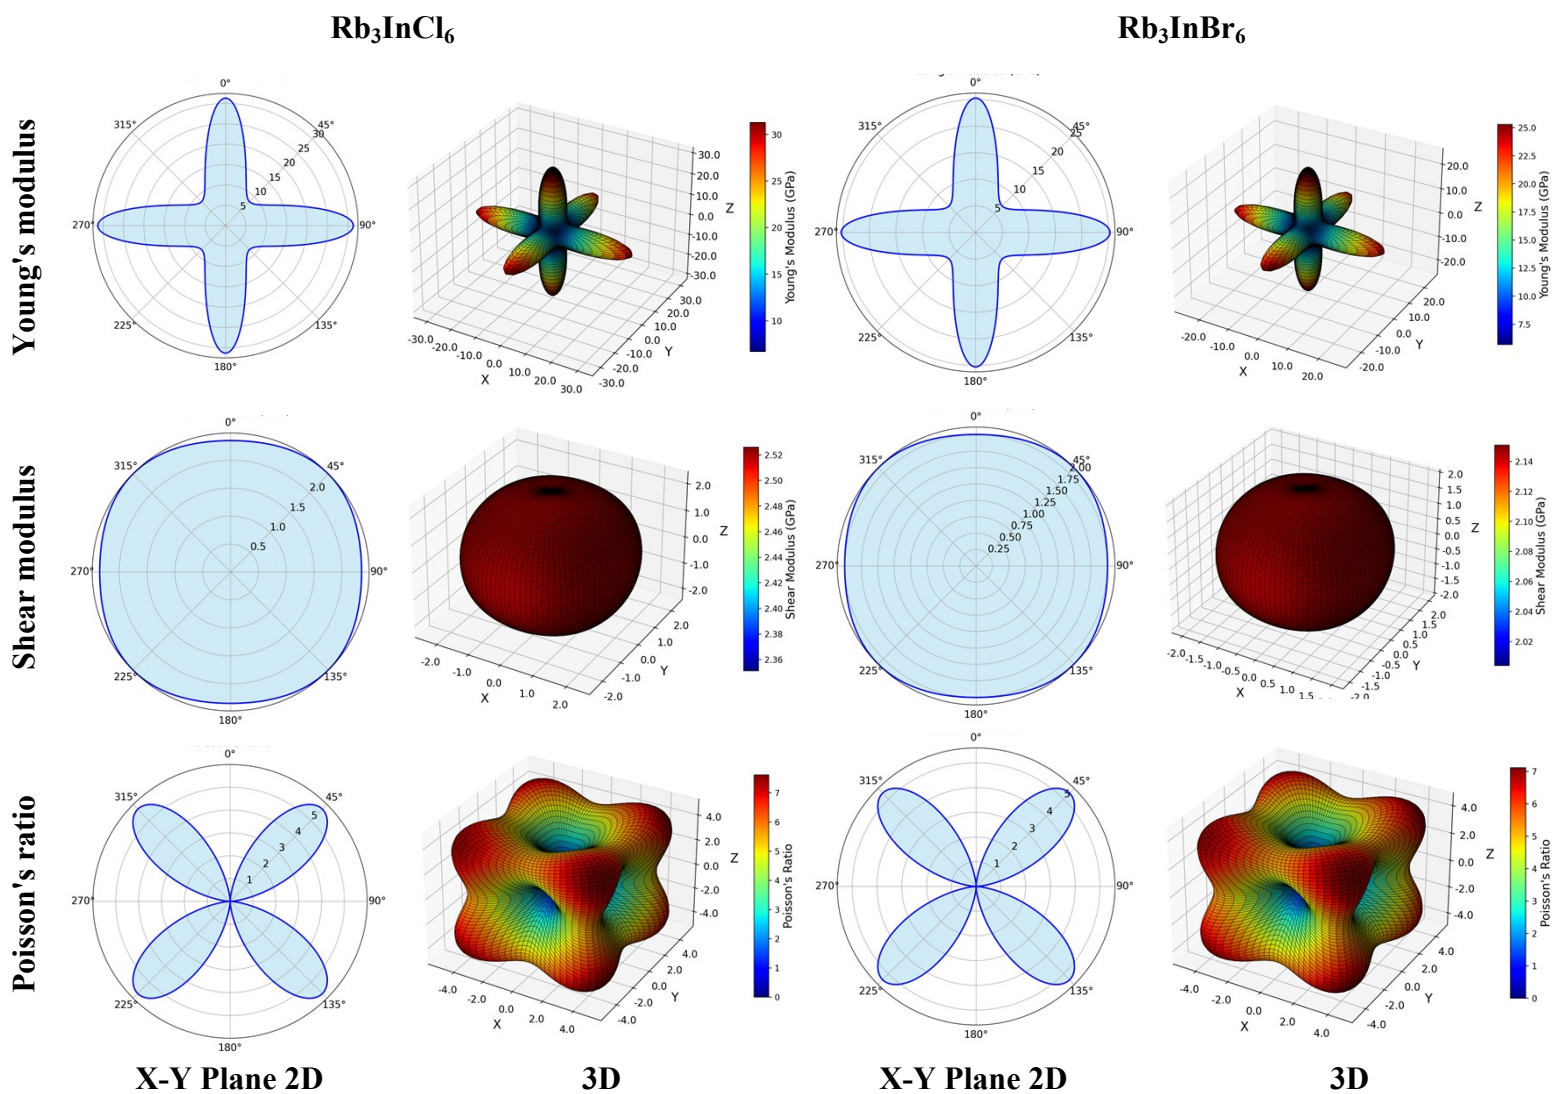

Figure S1. Graphical assessment of  $\text{Rb}_3\text{InCl}_6$  and  $\text{Rb}_3\text{InBr}_6$  Perovskites anisotropy showing 2D and 3D figures.

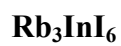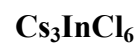

Young's modulus

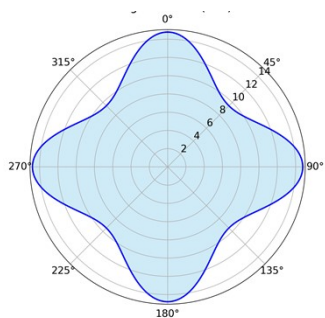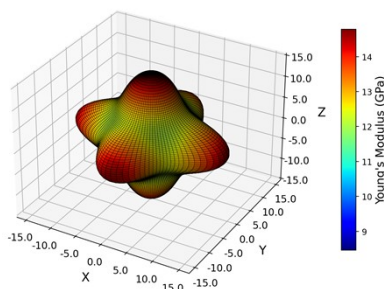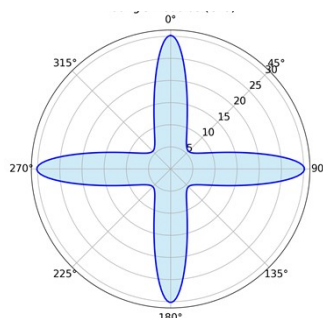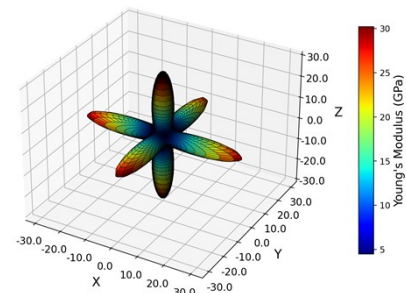

Shear modulus

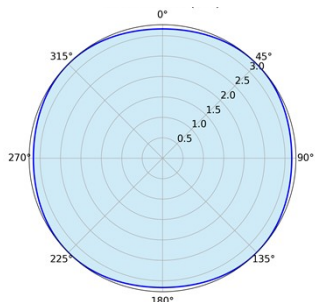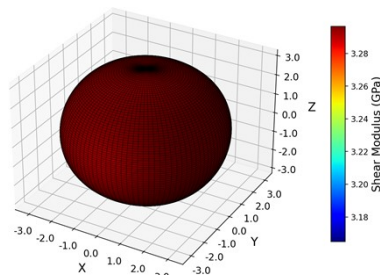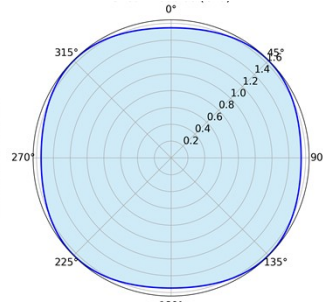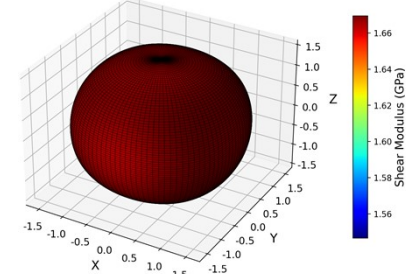

Poisson's ratio

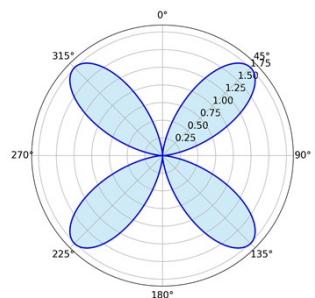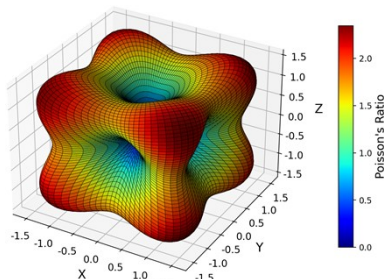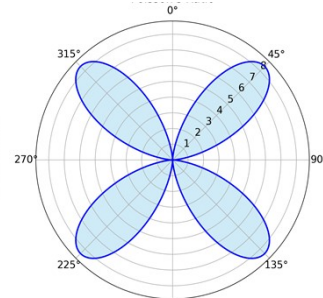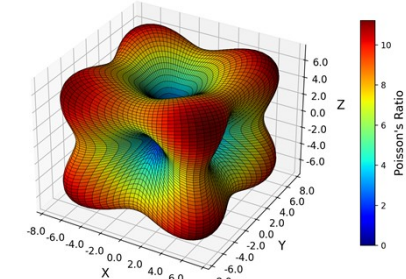

X-Y Plane 2D

3D

X-Y Plane 2D

3D

Figure S2. Graphical assessment of  $\text{Rb}_3\text{InI}_6$  and  $\text{Cs}_3\text{InCl}_6$  Perovskites anisotropy showing 2D and 3D figures.

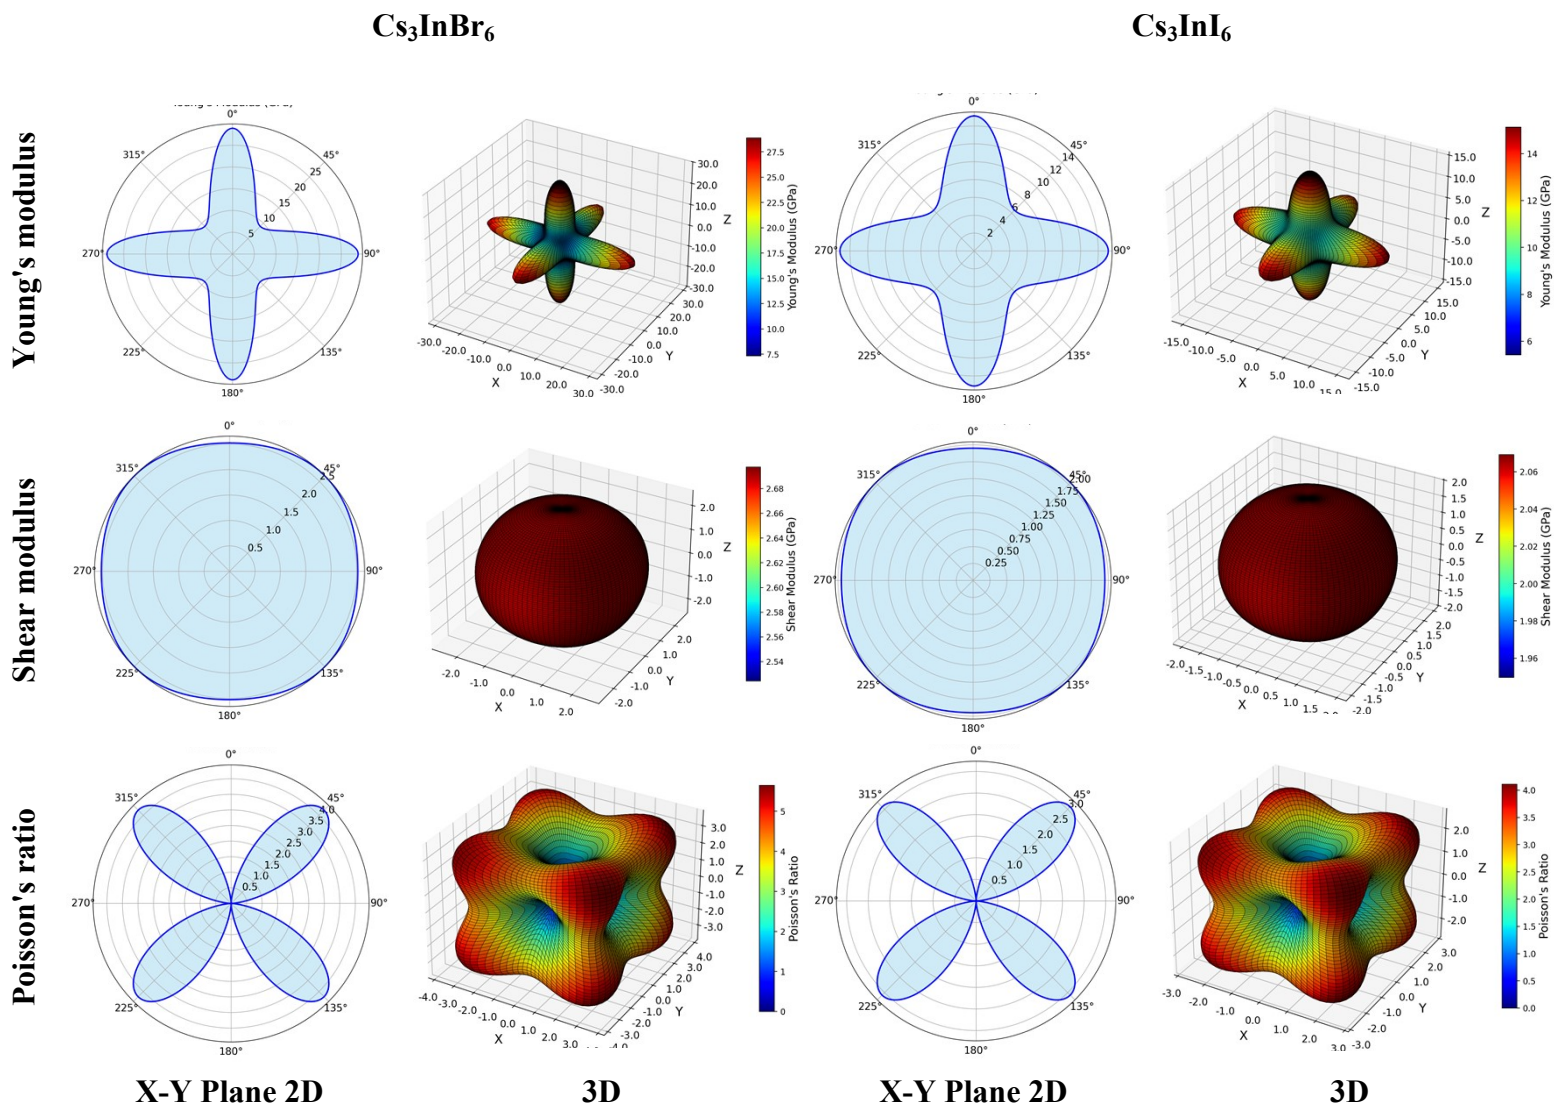

**Figure S3.** Graphical assessment of  $\text{Cs}_3\text{InBr}_6$  and  $\text{Cs}_3\text{InI}_6$  Perovskites anisotropy showing 2D and 3D figures.

**Table S4.** Mulliken and Hirshfeld charge analysis of different atoms of  $\text{A}_3\text{InX}_6$  (A=Rb, Cs, and X=Cl, Br, I) Perovskites

| Compound | Charge | Species | Mulliken atomic populations | Mulliken | Hirshfeld |
|----------|--------|---------|-----------------------------|----------|-----------|
|----------|--------|---------|-----------------------------|----------|-----------|

|                                   | <b>spilling</b> |        | <b>s</b> | <b>P</b> | <b>d</b> | <b>f</b> | <b>Total</b> | <b>change</b> | <b>change</b> |
|-----------------------------------|-----------------|--------|----------|----------|----------|----------|--------------|---------------|---------------|
| Rb <sub>3</sub> InCl <sub>6</sub> | 0.11%           | Rb (1) | 2.11     | 6.18     | 0.45     | 0.00     | 8.73         | 0.27          | 0.17          |
|                                   |                 | Rb (2) | 1.99     | 5.98     | 0.11     | 0.00     | 8.08         | 0.92          | 0.33          |
|                                   |                 | Rb (3) | 1.99     | 5.98     | 0.11     | 0.00     | 8.08         | 0.92          | 0.33          |
|                                   |                 | In     | 1.11     | 1.16     | 10.00    | 0.00     | 12.26        | 0.74          | 0.41          |
|                                   |                 | Cl     | 1.94     | 5.53     | 0.00     | 0.00     | 7.47         | -0.47         | -0.23         |
| Rb <sub>3</sub> InBr <sub>6</sub> | 0.09%           | Rb (1) | 2.13     | 6.39     | 0.53     | 0.00     | 9.05         | -0.05         | 0.16          |
|                                   |                 | Rb (2) | 2.03     | 6.15     | 0.20     | 0.00     | 8.38         | 0.62          | 0.32          |
|                                   |                 | Rb (3) | 2.03     | 6.15     | 0.20     | 0.00     | 8.38         | 0.62          | 0.32          |
|                                   |                 | In     | 1.41     | 1.39     | 10.00    | 0.00     | 12.81        | 0.19          | 0.35          |
|                                   |                 | Br     | 1.76     | 5.47     | 0.00     | 0.00     | 7.23         | -0.23         | -0.21         |
| Rb <sub>3</sub> InI <sub>6</sub>  | 0.11%           | Rb (1) | 2.21     | 6.36     | 0.56     | 0.00     | 9.13         | -0.13         | 0.14          |
|                                   |                 | Rb (2) | 2.08     | 6.14     | 0.18     | 0.00     | 8.40         | 0.60          | 0.32          |
|                                   |                 | Rb (3) | 2.08     | 6.14     | 0.18     | 0.00     | 8.40         | 0.60          | 0.32          |
|                                   |                 | In     | 1.12     | 1.53     | 10.00    | 0.00     | 12.65        | 0.35          | 0.27          |
|                                   |                 | I      | 1.83     | 5.41     | 0.00     | 0.00     | 7.24         | -0.24         | -0.20         |
| Cs <sub>3</sub> InCl <sub>6</sub> | 0.12%           | Cs (1) | 2.11     | 6.18     | 0.40     | 0.00     | 8.69         | 0.31          | 0.24          |
|                                   |                 | Cs (2) | 2.00     | 5.93     | 0.14     | 0.00     | 8.07         | 0.93          | 0.38          |
|                                   |                 | Cs (3) | 2.00     | 5.93     | 0.14     | 0.00     | 8.07         | 0.93          | 0.38          |
|                                   |                 | In     | 1.13     | 1.14     | 10.00    | 0.00     | 12.26        | 0.74          | 0.42          |
|                                   |                 | Cl     | 1.95     | 5.54     | 0.00     | 0.00     | 7.49         | -0.49         | -0.24         |
| Cs <sub>3</sub> InBr <sub>6</sub> | 0.10%           | Cs (1) | 2.14     | 6.39     | 0.47     | 0.00     | 9.00         | -0.00         | 0.21          |
|                                   |                 | Cs (2) | 2.05     | 6.13     | 0.19     | 0.00     | 8.37         | 0.63          | 0.35          |
|                                   |                 | Cs (3) | 2.05     | 6.13     | 0.19     | 0.00     | 8.37         | 0.63          | 0.35          |
|                                   |                 | In     | 1.36     | 1.38     | 10.00    | 0.00     | 12.74        | 0.26          | 0.35          |
|                                   |                 | Br     | 1.78     | 5.48     | 0.00     | 0.00     | 7.25         | -0.25         | -0.21         |
| Cs <sub>3</sub> InI <sub>6</sub>  | 0.10%           | Cs (1) | 2.19     | 6.33     | 0.51     | 0.00     | 9.03         | -0.03         | 0.18          |
|                                   |                 | Cs (2) | 2.09     | 6.15     | 0.18     | 0.00     | 8.42         | 0.58          | 0.35          |
|                                   |                 | Cs (3) | 2.09     | 6.15     | 0.18     | 0.00     | 8.42         | 0.58          | 0.35          |
|                                   |                 | In     | 1.14     | 1.51     | 10.00    | 0.00     | 12.65        | 0.35          | 0.28          |
|                                   |                 | I      | 1.83     | 5.41     | 0.00     | 0.00     | 7.25         | -0.25         | -0.19         |

## References

- [1] R. Rafiu, Md.S. Saikot, Md.A. Rahman, I. Apon, K. Kriaa, M. Benghanem, S. Alfaify, N. Elboughdiri, First-principles calculations to investigate structural, electronic, optical, elastic, mechanical and phonon properties of novel Q<sub>3</sub>GaBr<sub>6</sub> (Q = Na and K) for next-generation lead-free solar cells, *RSC Advances* 16 (2026) 7803–7829. <https://doi.org/10.1039/d5ra10011a>.
- [2] M.J. Islam, R. Amin, DFT-based numerical study of Cs<sub>3</sub>QR<sub>6</sub> (Q = In, Tl, Ga; R = I, Cl, Br) compounds for opto-solar applications, *Mater. Res. Express* 13 (2026) 015902. <https://doi.org/10.1088/2053-1591/ae2f2a>.
- [3] J.D. Majher, M.B. Gray, T. Liu, N.P. Holzapfel, P.M. Woodward, Rb<sub>3</sub> InCl<sub>6</sub> : A Monoclinic Double Perovskite Derivative with Bright Sb<sup>3+</sup> -Activated Photoluminescence, *Inorg. Chem.* 59 (2020) 14478–14485. <https://doi.org/10.1021/acs.inorgchem.0c02248>.
